# Supplementary material for: Hydrogen-motivated electrolysis of sodium carbonate with extremely low cell voltage
Source: Royal Society of Chemistry journal article supplement (doi:10.1039/c8cc00812d), 2018-01-01
Supplement: c8cc00812d1.pdf [file c8cc00812d1.pdf]

## Supplementary Materials

### Experimental Section

#### Reagents and materials

Sodium hydroxide (NaOH), sodium carbonate ( $\text{Na}_2\text{CO}_3$ ), sodium bicarbonate ( $\text{NaHCO}_3$ ), ammonium heptamolybdate tetrahydrate ( $(\text{NH}_4)_6\text{Mo}_7\text{O}_{24} \cdot 4\text{H}_2\text{O}$ ), nickel nitrate hexahydrate ( $\text{Ni}(\text{NO}_3)_2 \cdot 6\text{H}_2\text{O}$ ), chloroplatinic acid hexahydrate ( $\text{H}_2\text{PtCl}_6 \cdot 6\text{H}_2\text{O}$ ), ethylene glycol ( $\text{C}_2\text{H}_6\text{O}_2$ ) and PVP (MW=55000 g/mol) were purchased from Aladdin Reagent Co., Ltd, Shanghai. Polytetrafluoroethylene emulsion (PTFE, 60 wt%) and DuPont Nafion(5 wt%) were purchased from Hesen electric Co., Ltd, Shanghai. Carbon black (Black Pearl 1000) was obtained from Cabot Corporation, Tianjing. High purity water ( $18.25 \text{ M}\Omega \text{ cm}$ ) was used in all experiments.

#### Preparation of catalyst and electrode

The commercial carbon (BP1000) was firstly treated by  $\text{HNO}_3$  in order to introduce oxygen-functional group on surface. BP1000 (2 g) was added into 100 ml 7 M  $\text{HNO}_3$  solution and refluxed at  $120^\circ\text{C}$  for 16 h. The resulting product was filtered and washed with deionized water until the pH was approximately 7, then dried in a vacuum oven at  $60^\circ\text{C}$  for 12 h.

Pt/C electrocatalysts were synthesized by an ethylene glycol reduction method, that was similar to previous work [1]. 120 mg oxidized powder was dispersed in ethylene glycol by ultrasonic treatment for 20 min. Then 50 mg of  $\text{H}_2\text{PtCl}_6 \cdot 6\text{H}_2\text{O}$  and 3 mg PVP were added to the above mixture with ultrasonic treatment for 20min. The mixture solution was heated to  $140^\circ\text{C}$  and maintain 3 h under vigorous stirring. After cooling down, the produced nanoparticles were filtered, washed with ethanol to remove PVP, and dried in a vacuum oven at  $60^\circ\text{C}$  to obtain the home-made Pt/C.

5 mg Pt/C were dispersed in 500  $\mu\text{L}$  isopropanol and Nafion under ultrasonic treatment. 8  $\mu\text{L}$  of the electrocatalyst ink deposited on the surface of a glass carbon (GC) rotating disk electrode (RDE, Pine Instrument, geometric area:  $0.196 \text{ cm}^2$ ) to form a thin catalyst film.

Preparation of Pt/C-HOR anode. The Pt/C-HOR anode was a sandwich structure electrode, which consisted of Pt/C catalyst layer (CL), gas diffusion layer (DL) and nickel foam current collector. The DL thick membrane was prepared by the roll-in method that was similar to our previous work [2]. The CL was

prepared by coating the catalyst ink onto the DL. 100 mg Pt/C or Pd/C catalyst and 100 mg PTFE emulsion were dissolved in 20 mL solution of H<sub>2</sub>O:C<sub>2</sub>H<sub>5</sub>OH (V/V=1:1) to form solid-liquid catalyst ink. Then the catalyst ink was evenly coated on the surface of DL for several times to form the CL. The total loadings of Pt/C were controlled at 1 mg cm<sup>-2</sup>. After that, the CL-DL was thermal-treated at 150 °C under flowing. The CL-DL and a nickel foam were pressed at 20 MPa into HOA with a sandwich structure.

The NiMo/NiMoO<sub>4</sub> electrode for HER was prepared according to the reported paper [3]

### **Structural characterizations**

Transmission electron microscope (TEM) analysis of home-made Pt/C was carried out on a JEM-3010 operated at 200kV. Morphology structure of the NiMo/NiMoO<sub>4</sub> cathode were studied by a scanning electron microscopy (SEM, Zeiss SUPRA 55) operated at 20 kV.

### **Electrochemical polarization tests**

The cathodic and anodic polarization tests, including LSV, CV and constant current test, were carried out with an Electrochemistry Workstation (PARSTAT 2273) in a conventional three-electrode system. The prepared Pt/C-HOR anode or NiMo/NiMoO<sub>4</sub> HER cathode was used as the working electrode, a platinum foil as auxiliary electrode and SCE as reference electrode. RDE tests of HOR on Pt/C/GC at the scan rate from 400 rpm to 2500 rpm were conducted at 25 °C in 6 M NaOH, 1.5 M Na<sub>2</sub>CO<sub>3</sub> and 1 M NaHCO<sub>3</sub>, respectively. The HOR on hydrogen diffusion anode in 1.5 M Na<sub>2</sub>CO<sub>3</sub> and HER on NiMo/NiMoO<sub>4</sub> cathode in 6 M NaOH were both conducted at 70 °C.

### **Electrolysis tests**

The electrolysis test using OER-HER, OER-ORR and HOR-HOR were carried out in a two-compartment cell separated by ion-exchange membrane (F6801, Asahi Kasei Chemicals Corporation) at 70 °C. OER Anode for OER and HOR was commercial RuO<sub>2</sub>/Ti mesh (Northwest Institute for Nonferrous Metal Research, China) and home-made Pt/C-HOR electrode, respectively. Cathode for ORR and HER were Ag-ORC and NiMo/NiMoO<sub>4</sub>, respectively. The effective areas of both the anode and cathode were 8 cm<sup>2</sup>. 1.5 M Na<sub>2</sub>CO<sub>3</sub> and 6 M NaOH solutions as the initial anolyte and catholyte were pumped into the anodic and cathodic chambers respectively. Hydrogen was fed into gas chamber at a steady flow rate of 20 ml min<sup>-1</sup>. Electrolysis was carried out at a constant current of 800 mA for 8 h. Fresh electrolytes were pumped into the cathodic and anodic chambers after the previous electrolysis in order to identify whether the voltage is recovered.

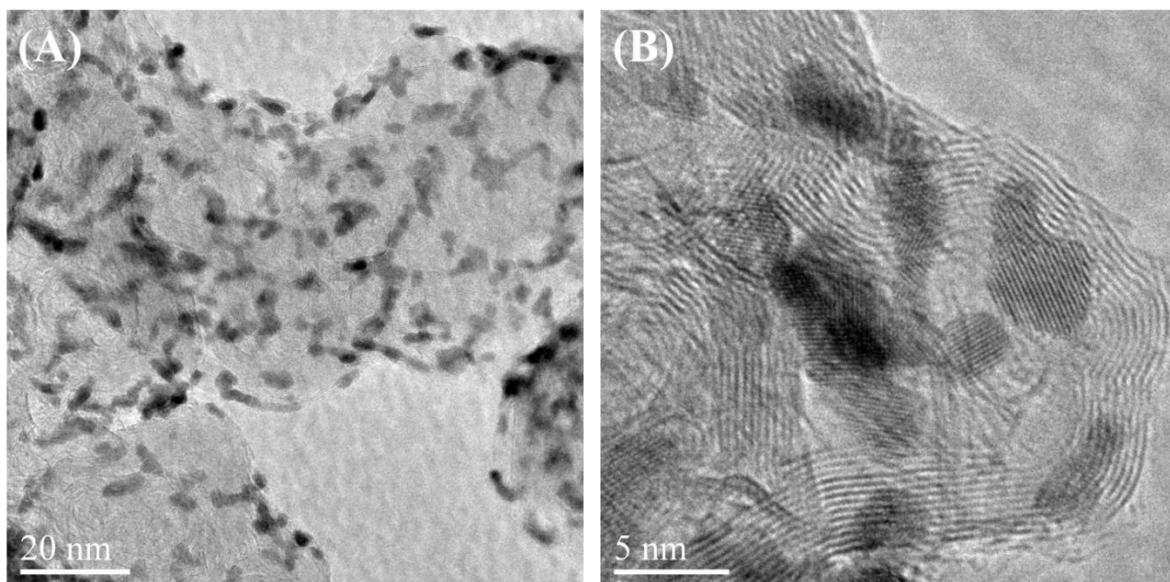

**Fig.S1** (A) TEM and (B) HRTEM images of Pt/C electrocatalyst

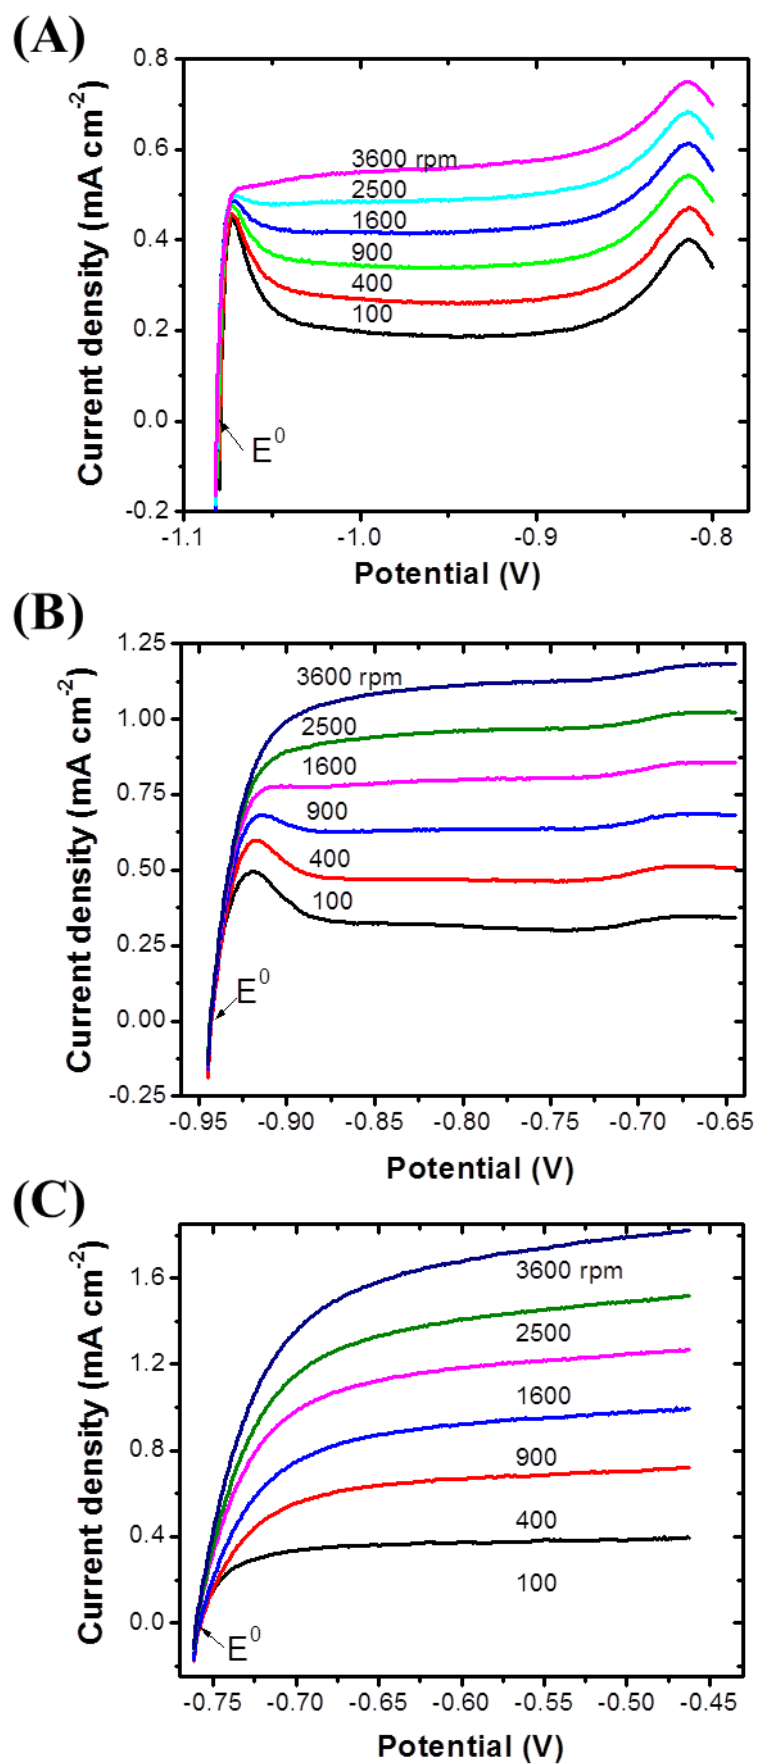

**Fig. S2** The HOR LSV curves on Pt/C modified GC RDE in  $H_2$ -saturated NaOH (A),  $\text{Na}_2\text{CO}_3$  (B) and  $\text{NaHCO}_3$  (C) electrolyte at scan rate of  $5 \text{ mV s}^{-1}$ . The rotation rate of RDE ranges from 100 to 3600 rpm.

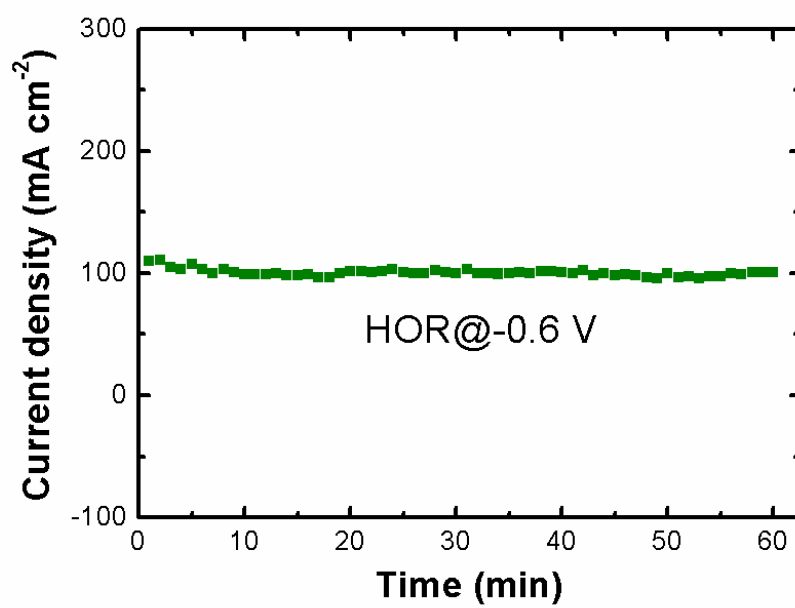

**Fig. S3** The HOR current density on hydrogen diffusion anode at potential of -0.6 V in 1.5 M Na<sub>2</sub>CO<sub>3</sub>

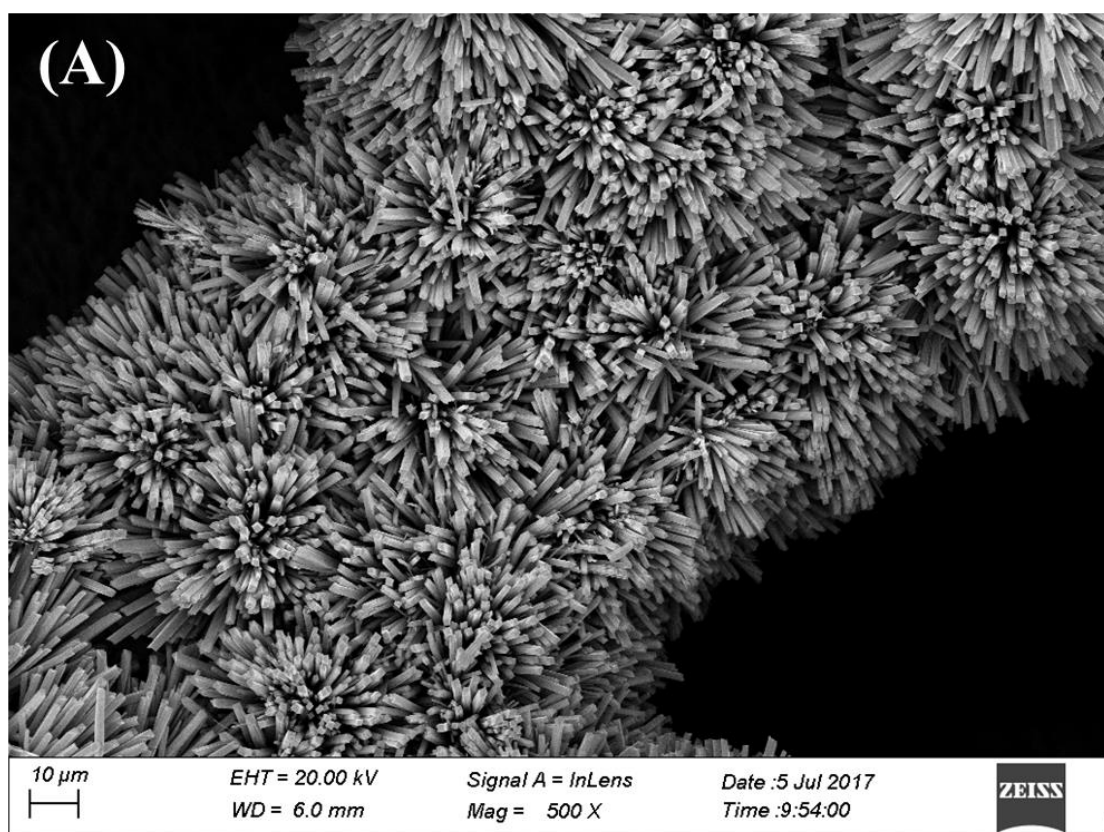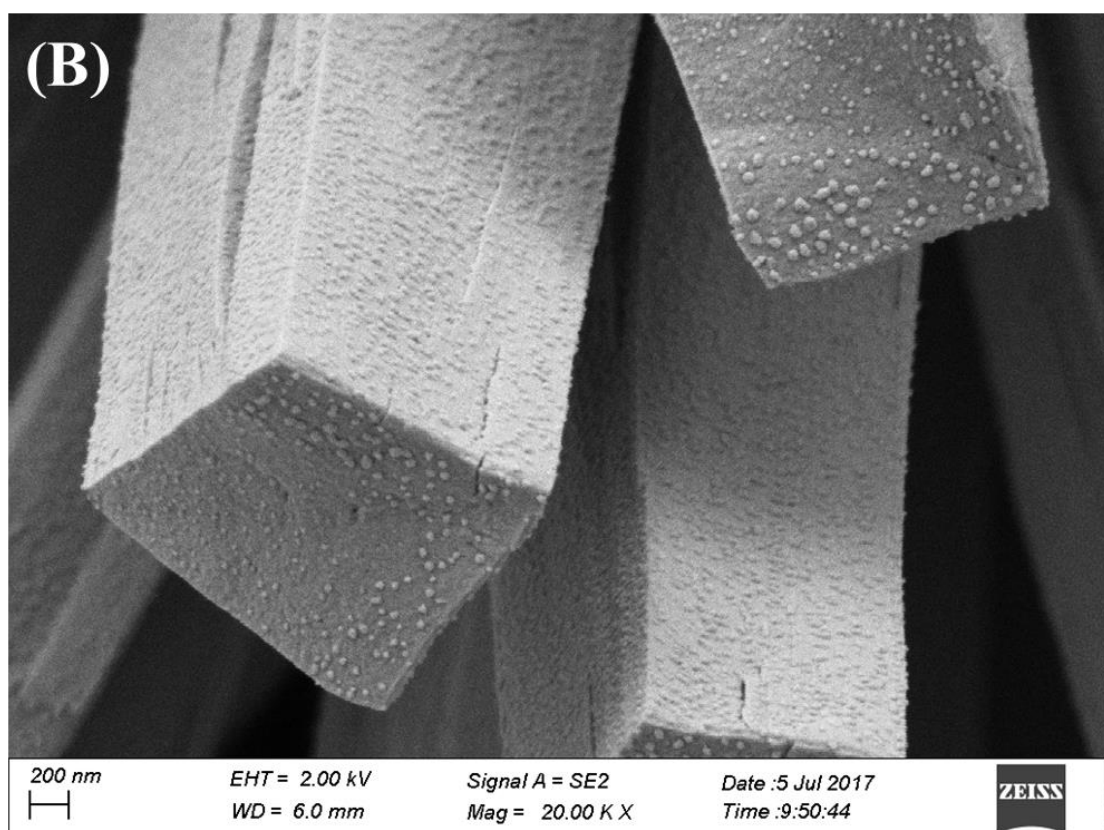

**Fig. S4** The SEM (a) and high magnification SEM (b) images of NiMo/NiMoO<sub>4</sub> cathode

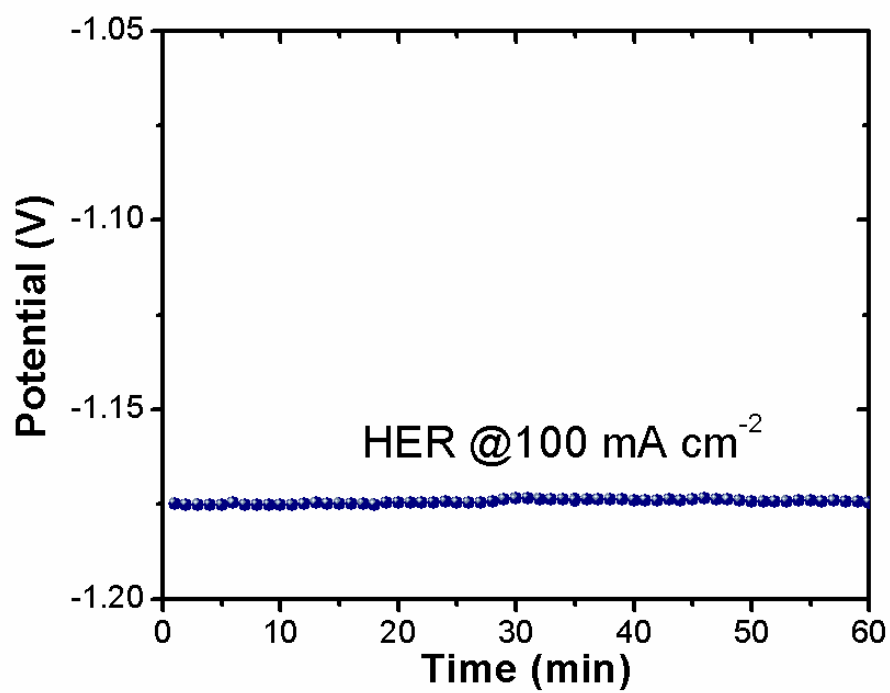

**Fig. S5** Potential vs time for HER on NiMo/NiMoO<sub>4</sub> cathode at constant current density of 100 mA cm<sup>-2</sup> in 6 M NaOH catholyte.

**Tab. S1** Average cell voltage, CE and electrical energy consumption of different electrolysis methods

| NO. | Anode | Cathode | Average cell voltage (V)* | CE <sub>NaOH</sub> (%) | kWh/t <sub>NaOH</sub> |
|-----|-------|---------|---------------------------|------------------------|-----------------------|
| 1   | HOA   | HEC     | 0.88                      | 90.3                   | 653                   |
| 2   | OEA   | ORC     | 1.51                      | 91.2                   | 1100                  |
| 3   | OEA   | HEC     | 2.51                      | 91.8                   | 1832                  |

Average cell voltage values were calculated according to the cell voltage during the 8 hours electrolysis at the same applied current density.

## Reference

1. Rao, C. V.; Reddy, A. L. M.; Ishikawa, Y.; Ajayan, P. M., Synthesis and electrocatalytic oxygen reduction activity of graphene-supported Pt<sub>3</sub>Co and Pt<sub>3</sub>Cr alloy nanoparticles. *Carbon* **2011**, 49 (3), 931-936.
2. Tang, Y.; Li, Y.; Sun, Y.; Wang, J.; Chen, Y.; Yang, X.; Wan, P., Energy-saving electrolysis of sodium carbonate with a silver nanoparticles/carbon oxygen reduction cathode. *Electrochemistry Communications* **2013**, 27, 108-111.
3. Zhang, J.; Wang, T.; Liu, P.; Liao, Z.; Liu, S.; Zhuang, X.; Chen, M.; Zschech, E.; Feng, X., Efficient hydrogen production on MoNi<sub>4</sub> electrocatalysts with fast water dissociation kinetics. *Nature Communications* **2017**, 8, 15437.
